# Supplementary material
Source: publisher figshare collection journal article supplement (https://acs.figshare.com/ndownloader/files/4261912)
Supplement: Supplementary file 1 [file 4261912]

(Supporting Information for an Article to the Editor of *Bioconjugate Chemistry*)

**Zinc-Chelated Poly(1-vinylimidazole) and a Carbohydrate Ligand Polycation Form DNA Ternary Complexes for Gene Delivery**

Shoichiro Asayama,\* Satoshi Nishinohara, and Hiroyoshi Kawakami

Department of Applied Chemistry, Tokyo Metropolitan University,  
1-1 Minami-Osawa, Hachioji, Tokyo 192-0397, Japan

\*To whom correspondence should be addressed.

E-mail: asayama-shoichiro@tmu.ac.jp.

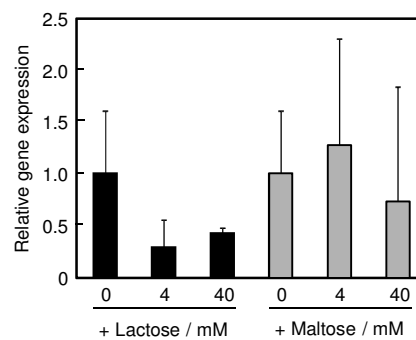

**Figure S-1.** Cellular recognition of PLL-Lac/PVIm-Zn/DNA ternary complexes by HepG2 cells. The PLL-Lac/PVIm-Zn/DNA complexes were incubated in the presence of lactose (4 or 40 mM) or maltose (4 or 40 mM). Gene expression was represented as relative gene expression compared with the sample in the absence of lactose and maltose. Symbols and error bars represent the mean and standard deviation of the measurements made in triplicate wells.
